# Supplementary material for: Ceramides And Stress Signalling Intersect With Autophagic Defects In Neurodegenerative Drosophila blue cheese (bchs) Mutants
Source: PubMed Central journal article supplement (PMC4671070; doi:10.1038/srep15926), 2015-12-07
Supplement: srep15926-s1.pdf [file srep15926-s1.pdf]

## Supporting information for

### **Ceramides and Stress Signalling Intersect With Autophagic Defects in Neurodegenerative *Drosophila* blue cheese (*bchs*) Mutants**

Sarita Hebbar<sup>1,3#</sup>, Ishtapran Sahoo<sup>1,2#</sup>, Artur Matysik<sup>2</sup>, Irene Garcia Argudo<sup>2,4</sup>, Kathleen Amy Osborne<sup>2</sup>, Cyrus Papan<sup>3,5</sup>, Federico Torta<sup>7</sup>, Pradeep Narayanaswamy<sup>7</sup>, Xiu Hui Fun<sup>2</sup>, Markus R Wenk<sup>7</sup>, Andrej Shevchenko<sup>3</sup>, Dominik Schwudke<sup>1,6\*</sup> and Rachel Kraut<sup>2,4\*</sup>

<sup>1</sup>National Centre for Biological Sciences; Tata Institute of Fundamental Research; Bangalore, Karnataka, 560065; India

<sup>2</sup>School of Biological Sciences; Nanyang Technological University; Singapore, 637551, Republic of Singapore

<sup>3</sup>Max Planck Institute of Cell Biology and Genetics, Dresden, Germany

<sup>4</sup> Biotec, Technical University of Dresden, Dresden, Germany

<sup>5</sup> Sciex, Darmstadt, Germany

<sup>6</sup> Research Center Borstel, Borstel, Germany

<sup>7</sup>Department of Biochemistry, National University of Singapore, Singapore

#These authors contributed equally

\*corresponding authors

Contact:

RSKraut@ntu.edu.sg, phone: (65)63162842; fax: (65)67913856

dschwudke@fz-borstel.de, phone: (+49)4537188230, fax: (+49)45371887450

**S1, related to Figure 2**

**Survey of changes in phospholipid species across genotypes.** Grey shaded cells indicate no change; red indicates a significant decrease whereas green indicates a significant increase at  $p < 0.05$  as determined by ANOVA followed by post-hoc Tukey test. Numbers indicate percent change when compared to relevant genetic control.

| LIPID SPECIES |      | Percent change vs. genetic control, eve>GFP |              |              |                    |                 |                  | Percent change vs. genetic control, C155;eve>GFP |                  |                     |                 |                            |                    |                         |             |
|---------------|------|---------------------------------------------|--------------|--------------|--------------------|-----------------|------------------|--------------------------------------------------|------------------|---------------------|-----------------|----------------------------|--------------------|-------------------------|-------------|
|               |      | bchs mutants                                |              |              | CDase Perturbation |                 | SPT perturbation | bchs mutants                                     |                  | nSMase perturbation |                 |                            | CDase perturbation |                         |             |
|               |      | bchs 58/Df                                  | bchs 58/7024 | bchs 17/7024 | slab               | bchs 58/Df;slab | bchs 58/Df;lac   | lac                                              | C:155;bchs 58/Df | C:155>EPbchs        | C:155>EY-nSMase | C:155;bchs 58/Df>EY-nSMase | C:155>nSMase       | C:155;bchs 58/Df>nSMase | C:155>CDase |
| PC            | 28:0 |                                             |              |              |                    |                 |                  |                                                  |                  |                     | 192             |                            |                    |                         |             |
|               | 30:0 |                                             |              |              |                    |                 |                  |                                                  |                  |                     | 107             |                            |                    |                         |             |
|               | 30:1 |                                             |              |              |                    |                 |                  |                                                  |                  |                     |                 |                            |                    |                         |             |
|               | 30:2 | -36                                         | -34          | -35          | -35                |                 |                  | -50                                              |                  |                     |                 | -49                        |                    |                         |             |
|               | 32:0 |                                             |              |              |                    |                 |                  |                                                  |                  |                     |                 |                            |                    |                         |             |
|               | 32:1 |                                             |              |              |                    |                 |                  |                                                  |                  |                     |                 |                            |                    |                         |             |
|               | 32:2 |                                             |              |              |                    |                 |                  |                                                  |                  |                     |                 |                            |                    |                         |             |
|               | 32:3 |                                             |              |              |                    | 42              |                  |                                                  |                  |                     |                 |                            |                    |                         |             |
|               | 34:0 |                                             |              |              |                    |                 |                  |                                                  |                  |                     |                 |                            |                    |                         |             |
|               | 34:1 |                                             |              |              |                    |                 |                  |                                                  |                  |                     |                 |                            |                    |                         |             |
|               | 34:2 |                                             |              |              |                    |                 |                  |                                                  |                  |                     |                 |                            |                    |                         |             |
|               | 34:3 |                                             |              |              | 34                 | 59              | 32               | 36                                               |                  |                     |                 |                            |                    |                         |             |
|               | 34:4 |                                             |              |              |                    | 32              |                  |                                                  |                  |                     |                 |                            |                    |                         |             |
|               | 36:1 |                                             |              |              |                    |                 |                  |                                                  |                  |                     |                 |                            |                    |                         |             |
|               | 36:2 |                                             |              |              |                    |                 |                  |                                                  |                  |                     |                 |                            |                    |                         |             |
|               | 36:3 |                                             |              |              | 35                 | 70              |                  | 32                                               |                  |                     |                 |                            |                    |                         |             |
| 36:4          |      |                                             |              |              | 48                 |                 |                  |                                                  |                  |                     |                 | 58                         |                    | 61                      |             |
| PE-O          | 32:1 |                                             |              |              |                    |                 |                  |                                                  |                  |                     |                 |                            |                    |                         |             |
|               | 34:0 |                                             |              |              |                    | 54              |                  |                                                  | 160              |                     |                 |                            |                    |                         |             |
|               | 34:1 |                                             |              |              |                    |                 |                  |                                                  |                  |                     |                 |                            |                    |                         |             |
|               | 34:2 |                                             |              |              |                    |                 |                  |                                                  |                  |                     |                 |                            |                    |                         |             |
|               | 34:3 |                                             |              |              |                    |                 |                  |                                                  |                  |                     |                 |                            |                    |                         |             |
|               | 36:1 |                                             |              |              |                    |                 |                  |                                                  |                  |                     |                 |                            |                    |                         |             |

|       |      |     |  |     |     |    |    |     |     |    |     |     |  |  |    |  |    |
|-------|------|-----|--|-----|-----|----|----|-----|-----|----|-----|-----|--|--|----|--|----|
|       | 36:2 | 35  |  | 35  | 39  | 48 |    |     |     |    |     |     |  |  |    |  |    |
|       | 36:3 |     |  |     |     | 35 |    |     |     |    |     |     |  |  |    |  |    |
|       | 38:1 |     |  |     |     |    |    |     | 38  |    |     |     |  |  |    |  |    |
|       | 38:2 |     |  | 36  | 40  | 33 |    |     |     |    |     |     |  |  |    |  |    |
|       | 38:3 |     |  |     |     | 34 |    |     |     | 59 | 61  |     |  |  |    |  | 60 |
| PE    | 28:0 |     |  | -31 |     |    |    |     |     |    | 78  | 220 |  |  |    |  |    |
|       | 28:1 |     |  | -31 | -37 |    |    | -40 |     |    |     |     |  |  |    |  |    |
|       | 30:1 |     |  |     |     |    |    |     |     |    |     |     |  |  |    |  |    |
|       | 30:2 |     |  |     |     |    |    | -40 |     |    |     |     |  |  |    |  |    |
|       | 32:0 |     |  |     |     |    |    |     |     |    |     |     |  |  |    |  |    |
|       | 32:1 |     |  |     |     |    |    |     |     |    |     |     |  |  |    |  |    |
|       | 32:2 |     |  |     |     |    |    |     |     |    |     |     |  |  |    |  |    |
|       | 32:3 | -32 |  |     |     |    |    |     |     |    |     |     |  |  |    |  | 67 |
|       | 34:0 |     |  |     |     |    |    |     |     |    |     |     |  |  |    |  |    |
|       | 34:1 |     |  |     |     |    |    |     |     |    |     |     |  |  |    |  |    |
|       | 34:2 |     |  |     |     |    |    |     |     |    |     |     |  |  |    |  |    |
|       | 34:3 |     |  |     |     |    |    |     |     |    |     |     |  |  |    |  | 62 |
|       | 34:4 |     |  |     |     |    |    |     |     |    |     |     |  |  |    |  |    |
|       | 36:1 |     |  |     |     |    |    |     |     |    |     |     |  |  |    |  |    |
|       | 36:2 |     |  |     |     |    |    |     | -30 |    |     |     |  |  |    |  |    |
|       | 36:3 |     |  |     |     |    |    |     |     |    |     |     |  |  |    |  |    |
|       | 36:4 |     |  |     |     |    |    |     |     |    |     |     |  |  |    |  |    |
|       | 38:1 |     |  |     |     |    |    |     |     |    |     |     |  |  |    |  |    |
| 38:2  |      |     |  |     |     |    |    |     |     |    |     |     |  |  |    |  |    |
| 38:3  |      |     |  |     |     | 45 |    |     |     |    |     |     |  |  |    |  |    |
| CerPE | 30:1 |     |  |     |     |    |    |     |     |    |     |     |  |  |    |  |    |
|       | 32:1 |     |  |     |     |    |    |     |     |    |     |     |  |  |    |  |    |
|       | 32:2 |     |  |     |     |    |    |     |     |    |     |     |  |  |    |  |    |
|       | 34:1 |     |  |     |     |    |    |     |     |    |     |     |  |  |    |  |    |
|       | 34:2 |     |  |     |     |    |    |     |     |    |     |     |  |  |    |  |    |
|       | 36:1 |     |  |     |     |    |    |     |     |    | 53  |     |  |  | 47 |  |    |
|       | 36:2 |     |  |     |     |    |    |     |     |    |     |     |  |  |    |  |    |
|       | 38:1 |     |  |     |     |    | 54 |     |     | 78 | 103 |     |  |  |    |  |    |
|       | 38:2 |     |  |     |     |    |    |     |     |    |     |     |  |  |    |  |    |

**S2, related to Figure 2**

**Changes in total levels of lipids belonging to 6 major lipid classes across genotypes.** Numbers indicate the percent changes that are significant at  $p < 0.05$  as determined by ANOVA followed by post-hoc Tukey test. Grey shaded cells indicate no change; red indicates a significant decrease; green indicates a significant increase compared to genetic control.

| GENOTYPES                             |                                            |                           | PE              | PC | PE-ether | CerPE | Ceramide | Spingosine |
|---------------------------------------|--------------------------------------------|---------------------------|-----------------|----|----------|-------|----------|------------|
| Percent change as compared to eve>GFP | bchs mutants                               | bchs 58/Df                |                 |    |          |       | +37%     |            |
|                                       |                                            | bchs 58/7024              |                 |    |          |       |          |            |
|                                       |                                            | bchs 17/7024              |                 |    |          |       | +42%     |            |
|                                       | CDase perturbation                         | slab                      |                 |    |          |       | +29%     |            |
|                                       |                                            | bchs 58/Df; slab          |                 |    |          |       | +70%     |            |
|                                       | nSMase perturbation                        | bchs 58/Df; lace          |                 |    |          |       |          |            |
|                                       |                                            | lace                      |                 |    |          |       |          |            |
|                                       | Percent change as compared to C155;eve>GFP | bchs mutants              | C155;bchs 58/Df |    |          |       |          | +53%       |
| C155>EPbchs                           |                                            |                           |                 |    |          |       | +46%     |            |
| nSMase perturbation                   |                                            | C155>EY-nSMase            |                 |    |          |       | +84%     |            |
|                                       |                                            | C155;bchs 58/Df>EY-nSMase |                 |    |          |       |          |            |
|                                       |                                            | C155>nSMase               |                 |    |          |       | +360%    |            |
|                                       |                                            | C155;bchs 58/Df>nSMase    |                 |    |          |       | +290%    |            |
| CDase perturbation                    |                                            | C155>CDase                |                 |    |          |       |          |            |
|                                       |                                            | C155;bchs 58/Df>CDase     |                 |    |          |       |          | +337%      |

### S3, Sphingadienes in *bchs* mutant alleles, related to Figure 2

**Diene-ceramides (34:2 and 36:2) are not significantly affected in *bchs* mutant alleles.** Cer 34:2 and Cer 36:2 were identified based on LC-MS<sup>3</sup> generated signature product. Peak heights were used to compute absolute quantities in picomoles/brain unit. For a better representation of the MS results, related genotypes were normalized to a suitable genetic control (fixed at 100% indicated by the horizontal line). Bar graphs represent percent mean  $\pm$  SEM (with respect to genetic controls) in ceramide levels. The genetic controls include *eve*-Gal4 driving UASmCD8GFP (*eve*>GFP) alone or in combination with C155-Gal4 (C155; *eve*>GFP).

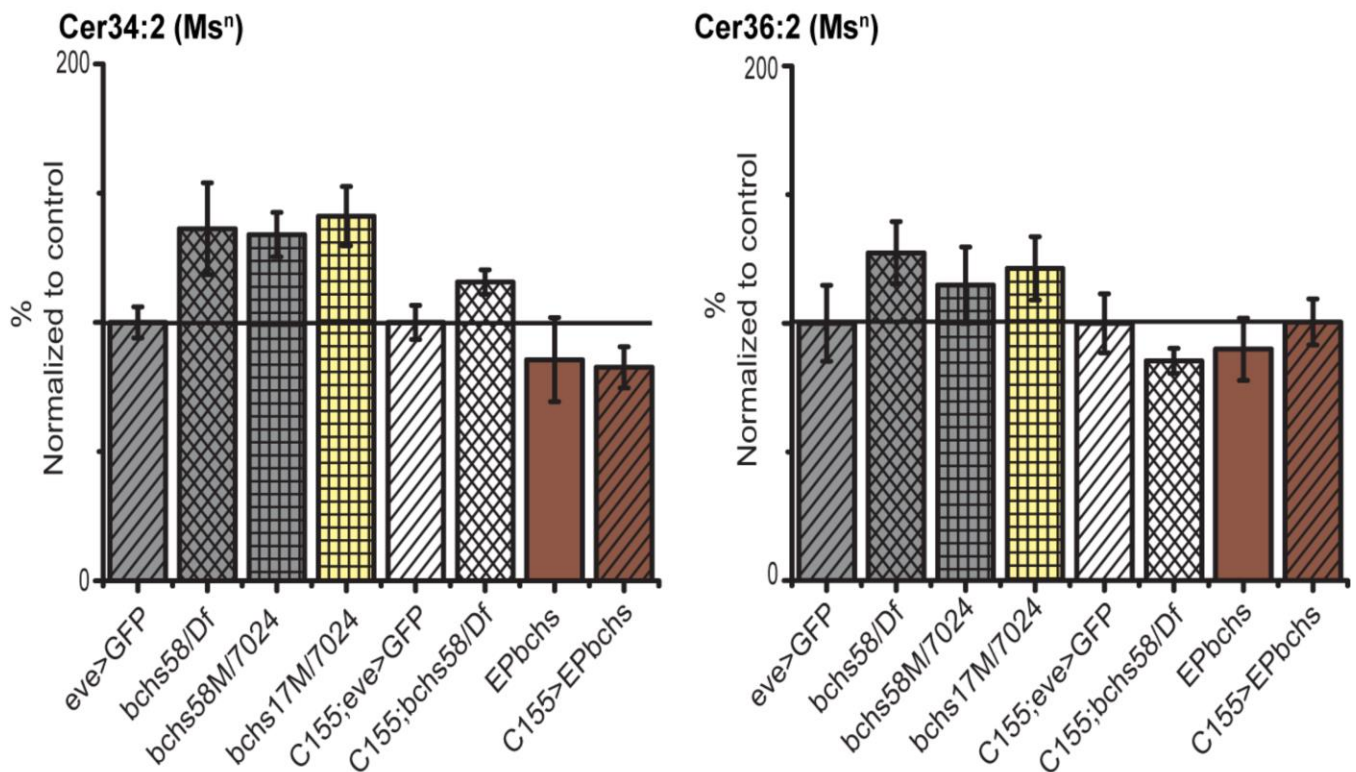

#### **S4, related to Figure 2**

**Comparison of levels of major ceramide species in *bchs* mutants and interactors.** Cer32:1, 34:1 are changed in *bchs* mutants and the modifier combinations. In contrast, Cer 36:1 levels are only changed in combinations that display the highest increases in ceramide levels.

Bar graphs represent mean  $\pm$  SEM of percent change (with respect to relative genetic controls) for total Cer32:1 (A), Cer34:1(B) and Cer36:1 (C) levels (quantified as picomoles/brain) in manipulations of CDase (green), nSMase (lavender/pink) and *lace/Spt2* (blue). For a better representation of the mass spectrometric results related genotypes were normalized to a suitable genetic control (fixed at 100% indicated by the horizontal line). The genetic controls include *eve*-Gal4 driving UASmCD8GFP (*eve*>GFP; grey hatched bars) alone or in combination with C155-Gal4 (C155; *eve*>GFP; white hatched bars). Bar colors represent different genetic perturbations, hatched bars indicate combination of multiple genetic perturbations. Numbers represent mean percent change relative to suitable genetic control whose lipid levels are fixed at 100% (indicated by horizontal line). \* $p < 0.05$ , \*\* $p < 0.005$  and \*\*\* $p < 0.0005$  between 2 genotypes indicated by black bar as determined by ANOVA followed by post-hoc Tukey analyses.

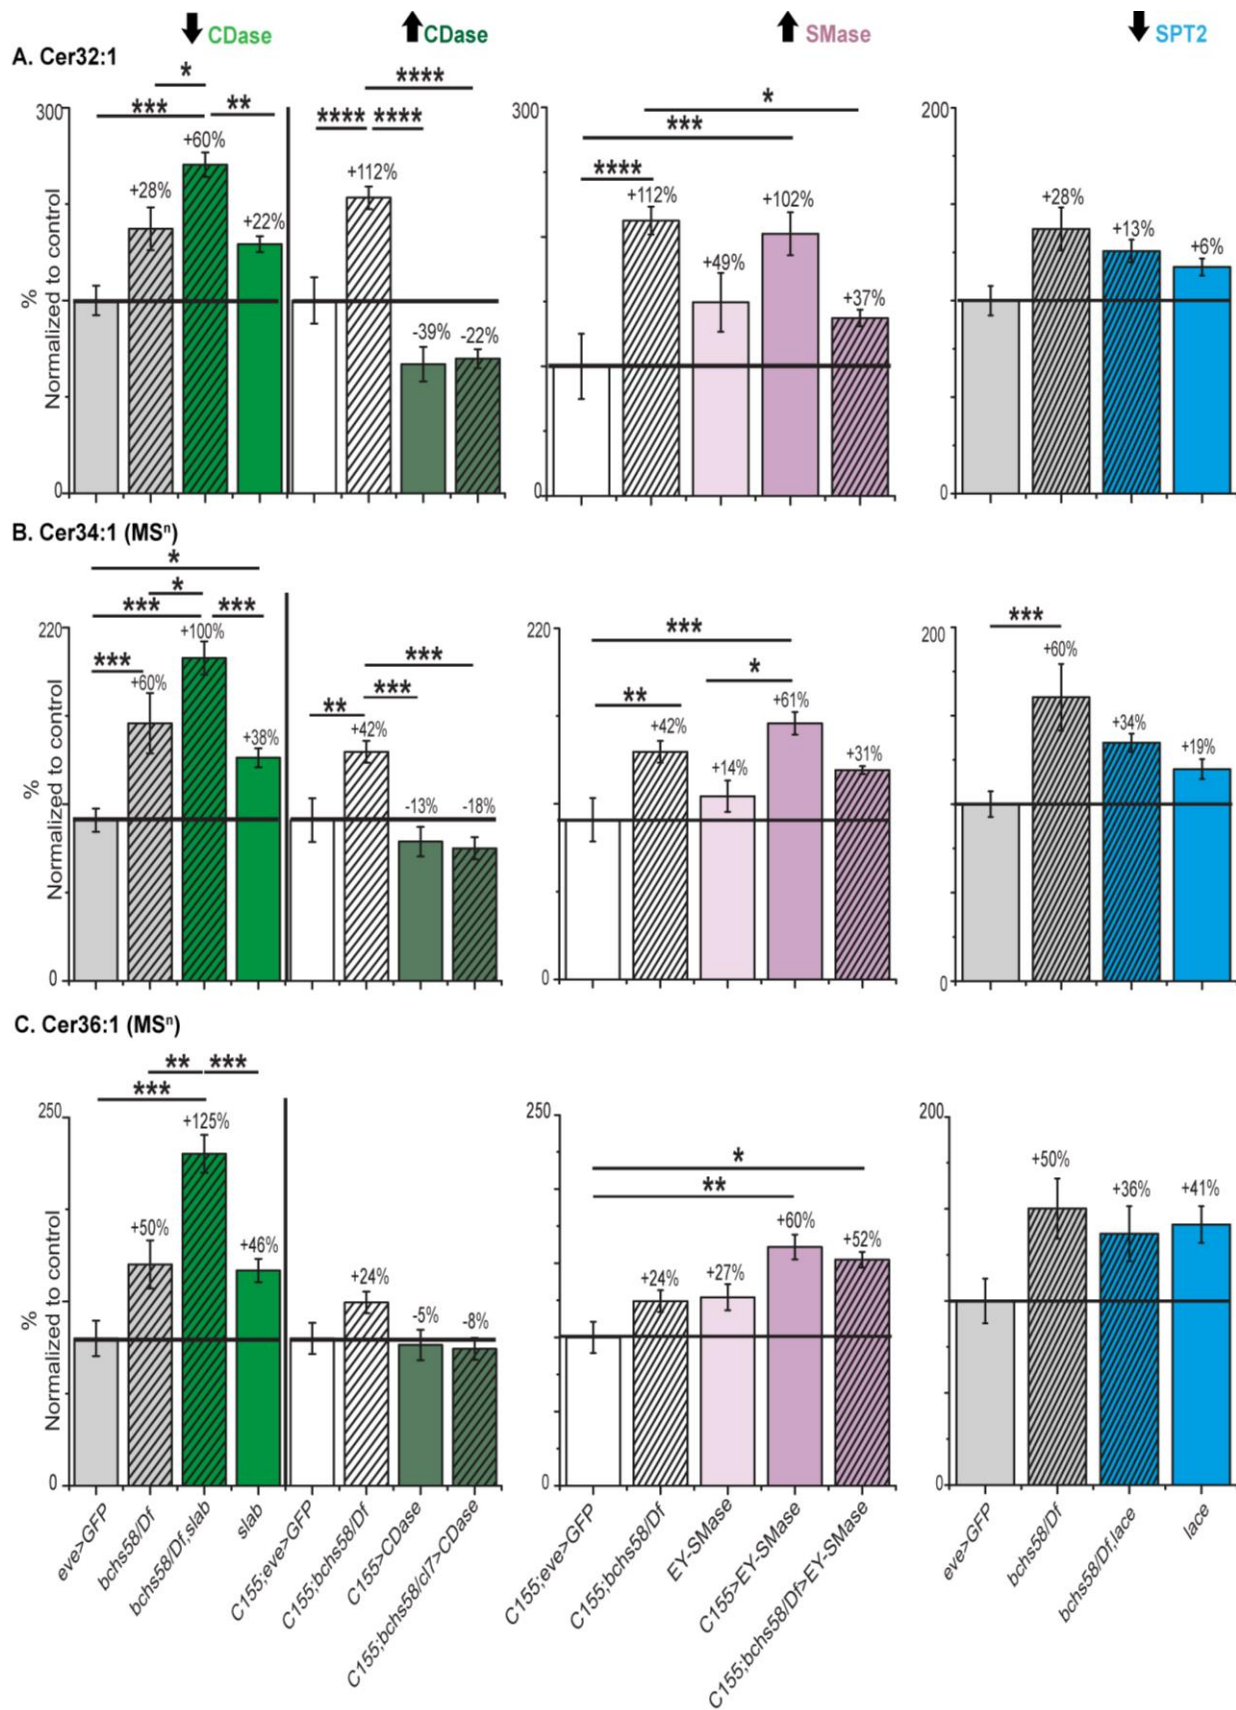

## S5, related to Figure 2

**Trends for diene-ceramides (34:2 and 36:2).** Cer 34:2 (A) and Cer 36:2 (B) levels remain unaltered in most genotypes with the exception of *slab* combinations. Bar graphs represent mean  $\pm$  SEM of percent change (with respect to relative genetic controls) for total Cer34:2 (A) and Cer36:2 (B) levels (quantified as picomoles/brain) in manipulations of CDase, nSMase and *lace/Spt2*. For a better representation of the mass spectrometric results related genotypes were normalized to a suitable genetic control (fixed at 100% indicated by the horizontal line). The genetic controls include *eve*-Gal4 driving UASmCD8GFP (*eve*>GFP; grey hatched bars) alone or in combination with C155-Gal4 (C155; *eve*>GFP; white hatched bars). Bar colors represent different genetic perturbations, hatched bars indicates combination of multiple genetic perturbations. Numbers represent mean percent change relative to suitable genetic control whose lipid levels are fixed at 100% (indicated by horizontal line). \* $p < 0.05$ , \*\* $p < 0.005$  and \*\*\* $p < 0.0005$  between 2 genotypes indicated by black bar as determined by ANOVA followed by post-hoc Tukey analyses.



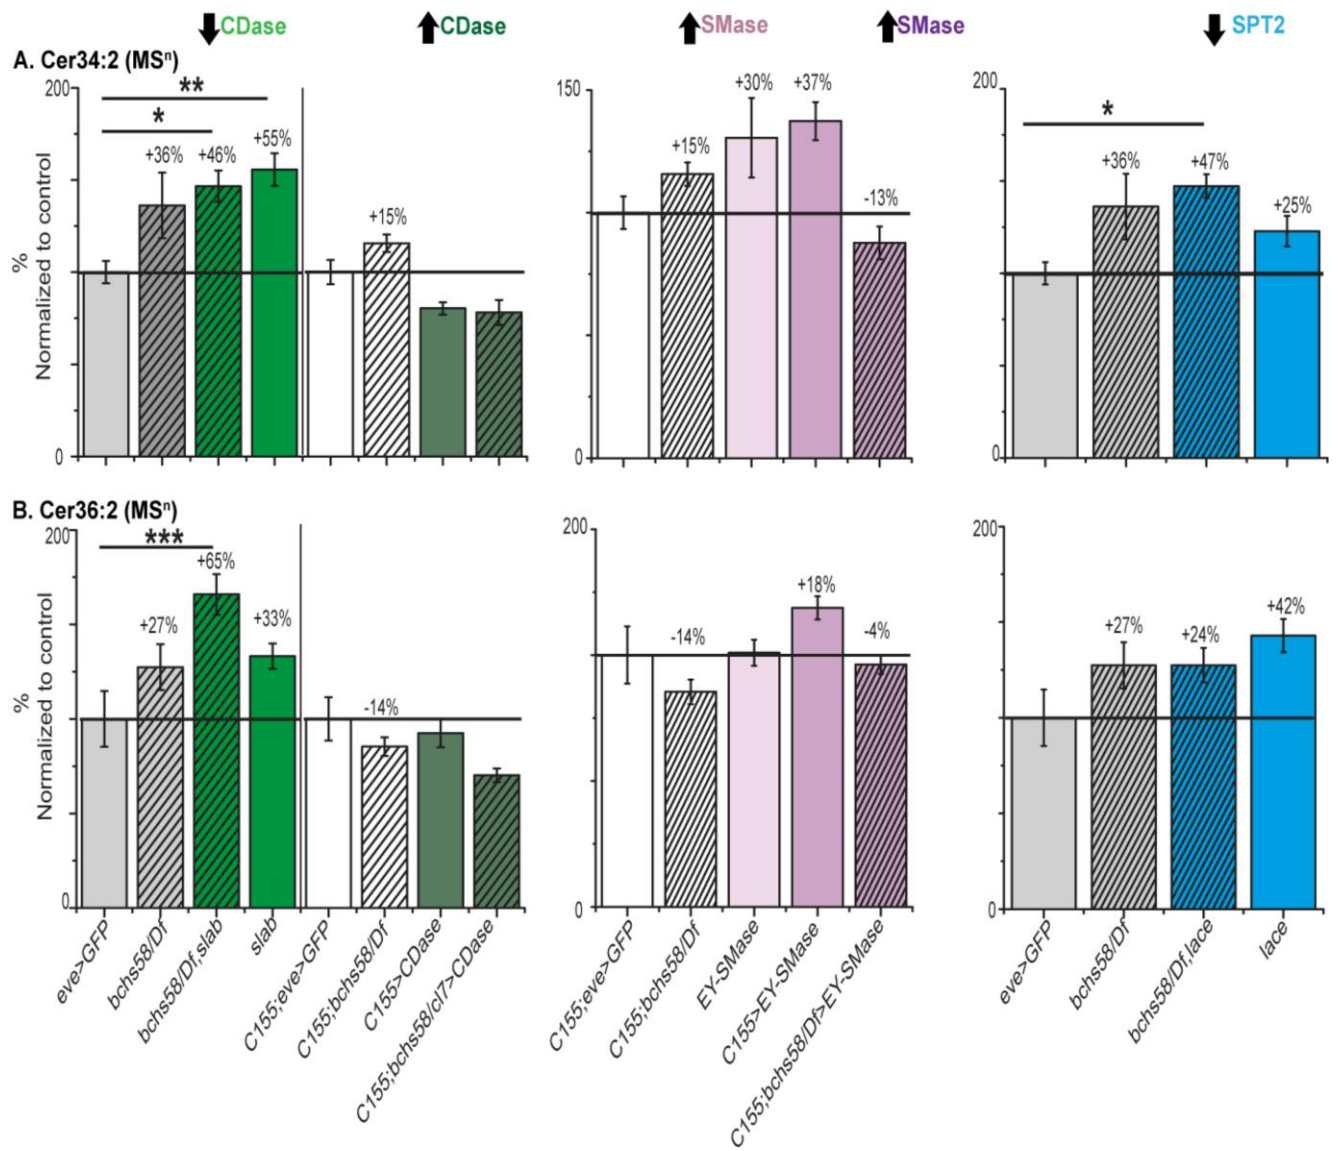

**S6, related to Figure 2**

**Changes in phosphorylated sphingosines (S1Ps) and sphingosines (Sph) do not correlate with exacerbation or rescue of *bchs* mutants in adult head.** Comparison of levels of major Long Chain Base-phosphates (LCB-Ps; here referred to as S1Ps) (A) and LCBs (here referred to as sphingosines) (B) species in *bchs* mutant heads alone and in ceramidase (CDase) loss-of-function (*slab*<sup>2/+</sup>) or overexpressing (OE-CDase) backgrounds showed that the levels of these metabolites do not correlate with rescue or exacerbation of *bchs* phenotypes, as ascertained in other assays. Data represent mean values and standard error of a triplicate experiment. Values are pmol (A) and ng (B) in extracts from 50 adult male 4 day-old heads.

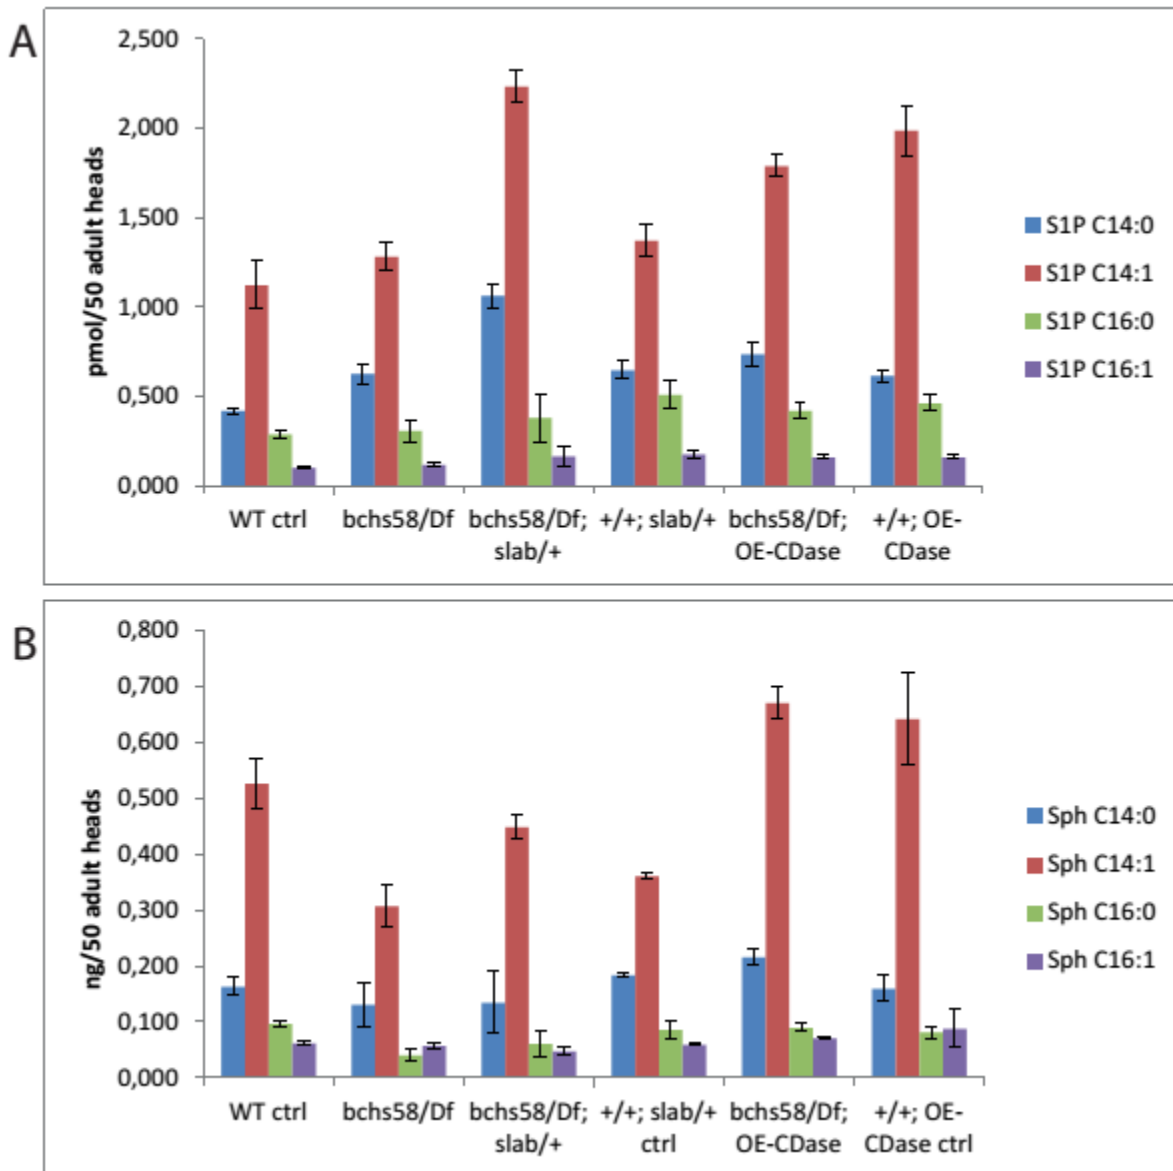

## S7, related to Figure 4/5

**Effects of rapamycin treatment on Atg8 and Ref(2)p:** Atg8 and Ref(2)p were analyzed using various parameters as in fig. 4, to quantitatively assess the changes observed in *bchs* mutant (*bchs*<sup>58</sup>/*Df(2L)c17*) and wild type (*w*<sup>1118</sup>) control (WT) primary cultured neurons under rapamycin treatment. The graphs show the Atg8 and Ref(2)p (A) spot density, (B) mean spot intensity, (C) spot size in the presence (light bars) or absence (dark bars) of rapamycin. (D) Numbers of Atg8 and Ref(2)p spots per cell in the sphingolipid-modifying genetic backgrounds that showed interactions with *bchs* (*slab* = *slab*<sup>2</sup>/+; *EY-nSMase* = *C155*; *EY-nSMase*/+; *UAS-CDase* = *C155*; *UAS-nCDase*(*slab*)/+; *lace* = *lace*<sup>k05305</sup>/+). No significant differences are observed from wild type, given in the graphs in A.

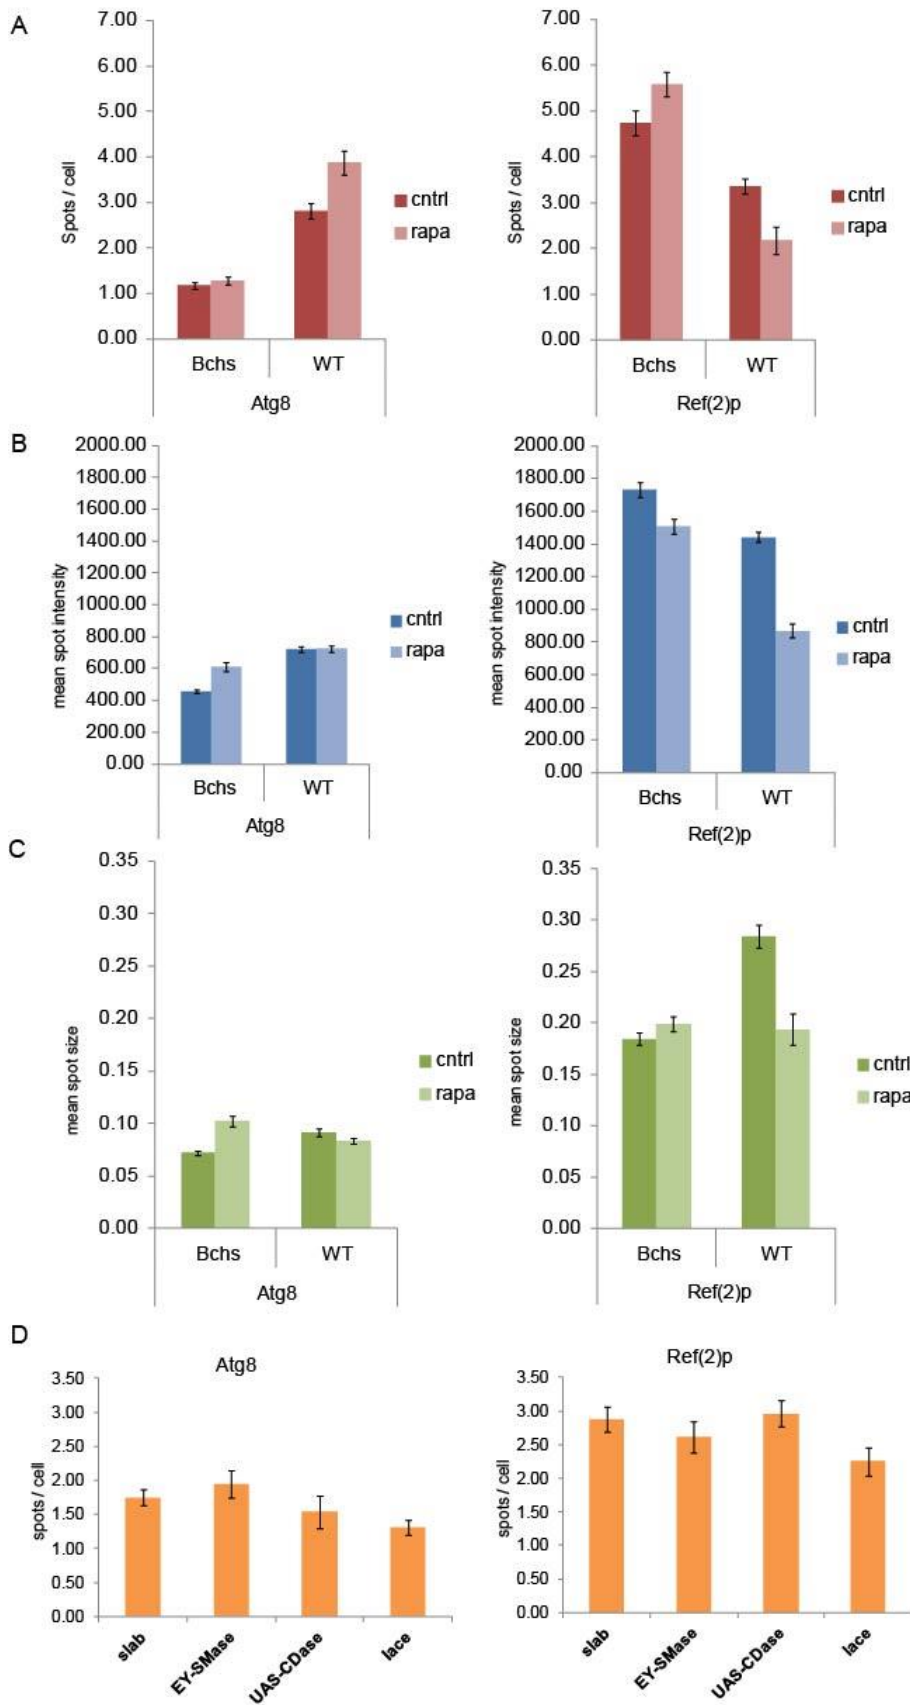

**S8, related to Figure 6/7**

**Full Western blots.** Full Western blots of S2R+ cells used in Fig. 7, treated with Fumonisin B1 (A-a), myriocin (A-b) and rapamycin (A-c). Samples were probed against total Akt, p-Akt, p-MKK4 and p-JNK all normalized to histone H3 or actin loading control. Adult head samples (B) and larval brain samples (C) from *bchs* and *bchs* modifiers were probed against p-Akt, p-MKK4 antibodies and the genotypes shown in black bordered boxes were compared and analyzed in Fig 6. Adult head samples and larval brain samples from *bchs* and *bchs* modifiers for total Akt (D) remained unchanged.

A S2R+ cells

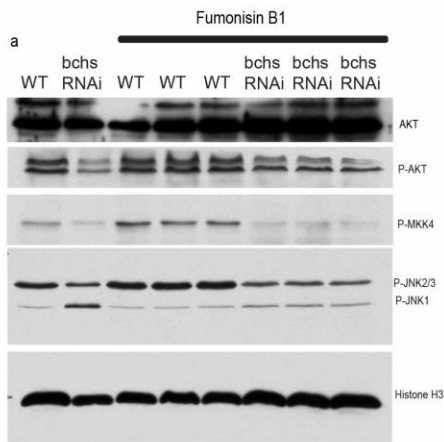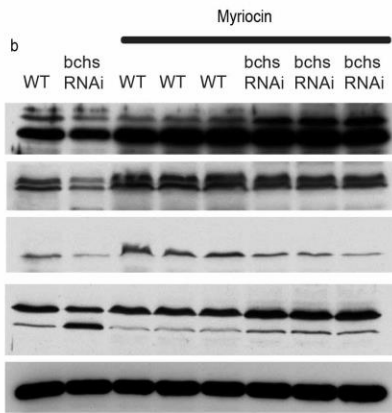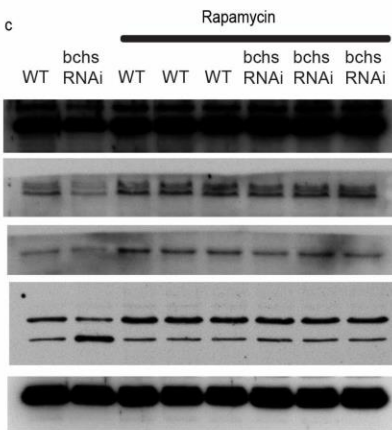

F Adult heads

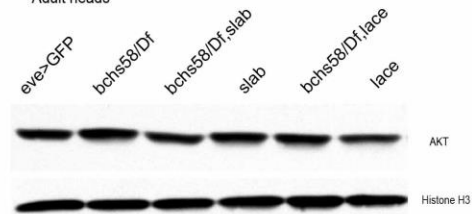

B Adult heads

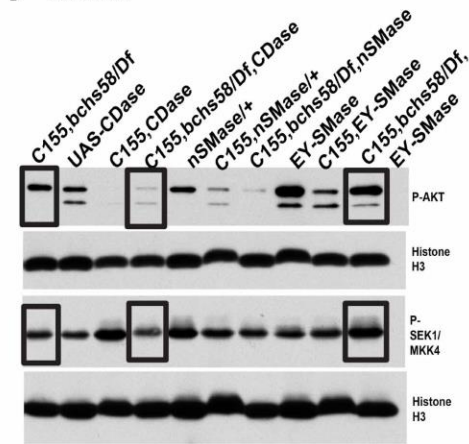

C Larval brains

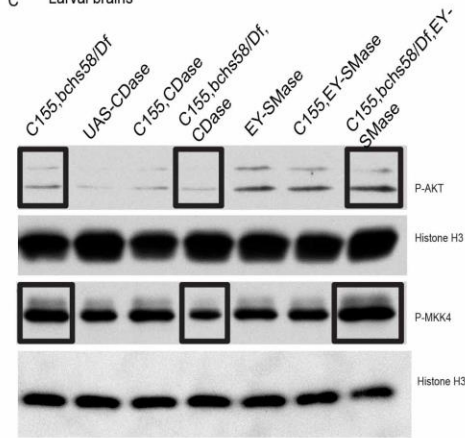

D Adult heads

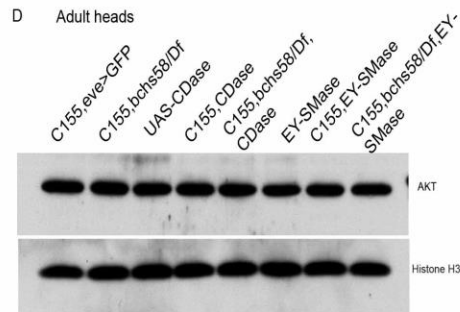

E Larval brains

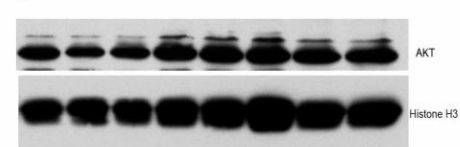

G Larval brains

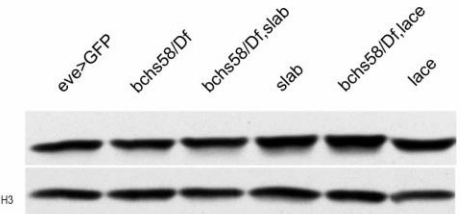

## S9, related to Experimental Procedures

### Genotypes used in the lipidomics study.

|                                                                 | GENOTYPE                                                           | IDENTIFIER               | N*  |
|-----------------------------------------------------------------|--------------------------------------------------------------------|--------------------------|-----|
| <b>Controls</b>                                                 |                                                                    |                          |     |
| Genetic background for mutant                                   | RRa-UASmCD8GFP/RRa-UASmCD8GFP                                      | eve>GFP                  | 5x2 |
| Genetic background for overexpression in nervous system         | C155; +; RRa-UASmCD8GFP/+                                          | C155; eve>GFP            | 3x2 |
| <b>Genetic perturbation in bchs</b>                             |                                                                    |                          |     |
| Null for bchs                                                   | bchs58/Df(2)cl7; RRa-mCD8GFP/RRa-mCD8GFP                           | bchs58/Df                | 4x2 |
| bchs insertional mutant                                         | EP2299/+;RRa-mCD8GFP/RRa-mCD8GFP                                   | EPbchs                   | 5x2 |
| Null for bchs (without P-element) and with another deficiency   | bchs58M/Exel7024; RRa-mCD8GFP/RRa-mCD8GFP                          | bchs58M/7024             | 5x2 |
| Loss of function allele                                         | bchs17M/Exel7024; RRa-mCD8GFP/RRa-mCD8GFP                          | bchs17M/7024             | 5x2 |
| Overexpression for bchs                                         | C155;EP(2)2299/+; RRa-mCD8GFP/RRa-mCD8GFP                          | C155>EPbchs              | 3x2 |
| Gal-4 in background of bchs null                                | C155; bchs58/Df(2)cl7; RRa-mCD8GFP/+                               | C155>bchs58/Df           | 3x2 |
| <b>Genetic perturbation in CDase (CG1471) and bchs</b>          |                                                                    |                          |     |
| CDase mutant                                                    | slab2, RRa-mCD8GFP/ RRa-mCD8GFP                                    | slab                     | 5x2 |
| bchs mutant + CDase mutant                                      | bchs58/Df(2)cl7; slab2, RRa-mCD8GFP/ RRa-mCD8GFP                   | bchs58/Df, slab          | 5x2 |
| CDase overexpression in nervous system                          | C155;UAS-CDase/+; RRa-mCD8GFP/+                                    | C155>CDase               | 3x2 |
| bchs mutant + CDase Overexpression in nervous system            | C155;bchs 58/Df(2)cl7,UAS-CDase;RRa-mCD8GFP/+                      | C155;bchs 58/cl7>CDase   | 3x2 |
| <b>Genetic perturbation in neutral SMase (CG12304) and bchs</b> |                                                                    |                          |     |
| genetic background for nSMase overexpression                    | UAS-nSMase/+;RRa-CD8GFP/+                                          | nSMase                   | 3x2 |
| nSMase overexpression in nervous system                         | C155; UAS-nSMase/+; RRa-CD8GFP/+                                   | C155>nSMase              | 2x2 |
| bchs mutant + nSMase Overexpression in nervous system           | C155;bchs58/Df(2)cl7,UAS-nSMase; RRa-CD8GFP/+                      | C155;bchs 58/Df>nSMase   | 3x2 |
| EY insertion associated with nSMase gene                        | EY00448,RRa-mCD8GFP/+                                              | EY-nSMase                | 3x2 |
| C155 driving EY                                                 | C155;+:EY00448,RRa-mCD8GFP/+                                       | C155>EY-nSMase           | 3x2 |
| bchs mutant + C155 driving EY                                   | C155;bchs58/Df(2)cl7, EY00448,RRa-mCD8GFP/+                        | C155;bchs 58/Df>EY-SMase | 3x2 |
| <b>Genetic perturbation in SPT gene(lace/CG4162) and bchs</b>   |                                                                    |                          |     |
| bchs mutant + lace mutant                                       | bchs58/Df(2)cl7, lace <sup>k05305</sup> ; RRa-mCD8GFP/ RRa-mCD8GFP | bchs58/Df, lace          | 5x2 |
| CG4162 (lace/SPT) mutant                                        | lace <sup>k05305</sup> ,RRa-mCD8GFP/ RRa-mCD8GFP                   | lace                     | 5x2 |

\* N represents biological replicates x replicates of mass spectrometric sample acquisition.

## S10, related to Experimental Procedures

### Internal Standard (IS) mix used

| LIPID STANDARD                  | Catalog No. | SOURCE                   | Added to extract (pmol) |
|---------------------------------|-------------|--------------------------|-------------------------|
| CerPE-C12 Sphingosyl PE [d17:1] | 110753      | Avanti Polar Lipids, USA | 11.94                   |
| PC [17:0-14:1]                  | LM-1004     | Avanti Polar Lipids, USA | 6.64                    |
| PE [17:1-14:0]                  | LM1104      | Avanti Polar Lipids, USA | 6.42                    |
| C17-Cer [d18:1/17:0]            | 860517P     | Avanti Polar Lipids, USA | 15.61                   |
| PE-OO [40:00]                   | 999985P     | Avanti Polar Lipids, USA | 10.73                   |
| Sphingosine [d17:1]             | LM-2000     | Avanti Polar Lipids, USA | 10.64                   |

### S11: Adult head LCB and LCB-P analysis

Samples were prepared and analysed as described in Narayanaswamy et al, 2014, with some modifications. 50 heads from adult flies (4 days old) for each genotype were collected in triplicate, flash frozen in liquid nitrogen, and stored at -80 C until lipid extraction.

After addition of LCB and LCB-P (d18:1 LCB-P  $^{13}\text{C}_2\text{D}_2$ ) standards (4 ng/ml) in 200  $\mu\text{l}$  of butanol:methanol (1:1) the samples were sonicated at room temperature for 30 min. After centrifugation at 14000 g for 10 min the supernatant was split into 2 equivalent aliquots. One aliquot was directly analysed (2  $\mu\text{l}$  injection) by LC-MSMS using a triple quadrupole Agilent 6460 and a 6490 Agilent UHPLC (0.4 ml/min flow) with a C18 Eclipse Plus HHD 2.1 x 50 mm Agilent column. Mobile phase A was 60% Methanol+40% 25 mM ammonium formate and mobile phase B was 90% Isopropanol+10% Methanol 25 mM ammonium formate. The transitions monitored in positive ion mode for LCBs were 246.20/228.2 and 246.2/210.2 (d14:0), 244.20/226.2 and 244.2/28.2 (d14:1), 274.20/256.2 and 274.2/238.2 (d16:0), 272.20/254.2 and 272.2/236.2 (d16:1), 309.20/291.2 and 309.2/273.2 (d18:0 d7 standard).



The second sample aliquot was diluted 10 times in acetonitrile and subjected to LCB-P enrichment on the IMP resin as described in Narayanaswamy 2014. The enriched fractions were dried and reconstituted in 100  $\mu$ l of methanol. 10  $\mu$ l of TMS-Diazomethane (2M in hexane) were added and the sample incubated for 20 min at room temperature under gentle mixing. The reaction was stopped by adding 1  $\mu$ l of acetic acid. The derivatized samples were dried in speedvac and reconstituted in 100  $\mu$ l of mobile phase before injecting into the chipLC-MSMS Agilent 6490 QQQ system. A customised HILIC-chip containing Amide-80 stationary phase (Tosoh Bioscience, LLC, Montgomeryville, PA, 5 nm particle size, 80 Å pore size) was used for the chromatographic separation (Agilent Technologies Corp., Santa Clara CA). Solvents used for HILIC HPLC: 50% acetonitrile in water containing 25 mM ammonium formate pH 4.6 (solvent A), 95% acetonitrile containing 25 mM ammonium formate pH 4.6. The MRM transitions used for LCB-P measurements in positive ion mode were 410.3/60 and 410.3/113 (d16:0), 408.3/60 and 408.3/113 (d16:1), 382.2/60 and 382.2/113 (d14:0), 380.2/60 and 380.2/113 (d14:1), 440.3/60 and 440.3/113 (d18:1  $^{13}\text{C}_2\text{D}_2$  standard).

## References

Narayanaswamy, P., Sulc, R., Kraut, R., Killeen, K., Grimm, R., Sellergren, B., Torta, F., and Wenk, M.R. (2014). Deep profiling using enhanced analytical workflows reveals new sphingoid base-phosphate species. *Analytical Chemistry*, 86 (6), pp 3043–3047.
